# Supplementary material for: Role of weak hydrogen bonds in the crystal structures of phenazine, 5,10-dihydrophenazine and their 1:1 and 3:1 molecular complexes
Source: Royal Society of Chemistry journal article supplement (doi:10.1039/a908744c), 2000-01-01
Supplement: a908744c.doc [file a908744c.doc]

Above: Compound **2** at 123 K

Below: Complex **3** at 300 K

Complex **4** at 300 K

The ORTEP diagram of each independent molecule is developed

separately in a view perpendicular to the mean plane of that molecule.
